# Supplementary material
Source: PubMed Central journal article supplement (PMC3931513)
Supplement: NIHMS522992-supplement-4.pdf [file NIHMS522992-supplement-4.pdf]

**SUPPLEMENTAL MATERIAL**

**Online Supplemental Table 1.** Left Ventricular Concentricity by Low vs. High Waist Circumference and Waist-Hip Ratio among Obese Participants (BMI  $\geq$  30 kg/m<sup>2</sup>)

|                                           | Left Ventricular Concentricity (g/mL) |         |
|-------------------------------------------|---------------------------------------|---------|
|                                           | Median (IQR)                          | P-value |
| <b>Overall Population</b>                 |                                       |         |
| Waist Circumference $\leq$ median (N=591) | 1.57 (1.38, 1.79)                     | <0.0001 |
| Waist Circumference > median (N=599)      | 1.68 (1.47, 1.94)                     |         |
| Waist-Hip Ratio $\leq$ median (N=594)     | 1.54 (1.37, 1.76)                     | <0.0001 |
| Waist-Hip Ratio > median (N=595)          | 1.70 (1.49, 1.96)                     |         |
| <b>Men</b>                                |                                       |         |
| Waist Circumference $\leq$ median (N=217) | 1.70 (1.52, 1.92)                     | 0.0001  |
| Waist Circumference > median (N=229)      | 1.81 (1.61, 2.10)                     |         |
| Waist-Hip Ratio $\leq$ median (N=222)     | 1.69 (1.50, 1.92)                     | <0.0001 |
| Waist-Hip Ratio > median (N=223)          | 1.82 (1.62, 2.11)                     |         |
| <b>Women</b>                              |                                       |         |
| Waist Circumference $\leq$ median (N=374) | 1.51 (1.33, 1.69)                     | <0.0001 |
| Waist Circumference > median (N=370)      | 1.57 (1.39, 1.85)                     |         |
| Waist-Hip Ratio $\leq$ median (N=372)     | 1.47 (1.32, 1.64)                     | <0.0001 |
| Waist-Hip Ratio > median (N=372)          | 1.62 (1.41, 1.88)                     |         |

P-value for  $\leq$  median vs. >median for each pair.

Abbreviations: BMI= body mass index; IQR= interquartile range

**Online Supplemental Table 2.** Sex-Specific Multivariable-Adjusted Linear Regression Models of Relation of Adiposity Phenotypes to Cardiac Structure and Function (Women N=1485, Men N=1225)

|                                   | LV Mass |                 | LV EDV  |                 | Concentricity |                 | LV Wall Thickness |                 |
|-----------------------------------|---------|-----------------|---------|-----------------|---------------|-----------------|-------------------|-----------------|
|                                   | $\beta$ | <i>P</i> -value | $\beta$ | <i>P</i> -value | $\beta$       | <i>P</i> -value | $\beta$           | <i>P</i> -value |
| <b>Visceral Fat</b>               |         |                 |         |                 |               |                 |                   |                 |
| Men                               | -0.05   | 0.19            | -0.23   | <0.0001         | 0.21          | <0.0001         | 0.10              | 0.01            |
| Women                             | 0.02    | 0.59            | -0.10   | 0.01            | 0.11          | 0.007           | 0.06              | 0.09            |
| <b>Abdominal Subcutaneous Fat</b> |         |                 |         |                 |               |                 |                   |                 |
| Men                               | 0.04    | 0.40            | -0.14   | 0.006           | 0.19          | 0.0004          | 0.13              | 0.007           |
| Women                             | -0.02   | 0.68            | -0.16   | 0.0002          | 0.16          | 0.001           | 0.12              | 0.006           |
| <b>Lower Body Fat</b>             |         |                 |         |                 |               |                 |                   |                 |
| Men                               | 0.02    | 0.72            | 0.20    | 0.0002          | -0.18         | 0.0007          | -0.11             | 0.02            |
| Women                             | -0.11   | 0.02            | 0.19    | <0.0001         | -0.31         | <0.0001         | -0.22             | <0.0001         |

Models constructed with cardiac measures as dependent variables and fat parameters as independent variables;  $\beta$  coefficient is per 1-SD of the fat parameter.

Model is adjusted for age, sex, African-American race, hypertension, diabetes, hyperlipidemia, exercise, alcohol use, cardiovascular disease, smoking, lean mass, visceral fat, abdominal subcutaneous fat, and lower body fat mass.

**Online Supplemental Table 3.** Multivariable-Adjusted Linear Regression Models of Relation of Adiposity Phenotypes to Cardiac Structure and Function with Additional Covariate Adjustments

|                                   | LV Mass |                | LV EDV  |                | Concentricity |                | LV Wall Thickness |                |
|-----------------------------------|---------|----------------|---------|----------------|---------------|----------------|-------------------|----------------|
|                                   | $\beta$ | <i>P-value</i> | $\beta$ | <i>P-value</i> | $\beta$       | <i>P-value</i> | $\beta$           | <i>P-value</i> |
| <b>Visceral Fat</b>               |         |                |         |                |               |                |                   |                |
| Model 1                           | -0.01   | 0.55           | -0.19   | <0.0001        | 0.19          | <0.0001        | 0.08              | 0.0006         |
| Model 2                           | 0.01    | 0.73           | -0.15   | <0.0001        | 0.17          | <0.0001        | 0.09              | 0.0008         |
| <b>Abdominal Subcutaneous Fat</b> |         |                |         |                |               |                |                   |                |
| Model 1                           | 0.003   | 0.89           | -0.11   | 0.0004         | 0.15          | <0.0001        | 0.11              | 0.0001         |
| Model 2                           | 0.01    | 0.61           | -0.06   | 0.11           | 0.11          | 0.005          | 0.09              | 0.004          |
| <b>Lower Body Fat</b>             |         |                |         |                |               |                |                   |                |
| Model 1                           | -0.06   | 0.03           | 0.18    | <0.0001        | -0.25         | <0.0001        | -0.16             | <0.0001        |
| Model 2                           | -0.08   | 0.01           | 0.20    | <0.0001        | -0.32         | <0.0001        | -0.20             | <0.0001        |

Models constructed with cardiac measures as dependent variables and fat parameters as independent variables;  $\beta$  coefficient is per 1-SD of the fat parameter.

Model 1 is adjusted for age, sex, African-American race, systolic blood pressure, antihypertensive medication use, diabetes, hyperlipidemia, exercise, alcohol use, cardiovascular disease, smoking, lean mass, visceral fat, abdominal subcutaneous fat, and lower body fat mass.

Model 2 is adjusted for all covariates from Model 1 plus log-leptin, log-adiponectin, log-C-reactive protein, and log-interleukin-6.
